# Supplementary material for: Long‐term expanding human airway organoids for disease modeling
Source: PubMed Central journal article supplement — EMBO J. 2019 Jan 14;38(4):e100300. doi: 10.15252/embj.2018100300 (PMC6376275; doi:10.15252/embj.2018100300), 2019-01-14
Supplement: EMBJ-38-e100300-s001.pdf [file EMBJ-38-e100300-s001.pdf]

## Table of contents Appendix Figures and Tables

|                     |                                                                                             | Page Start        |
|---------------------|---------------------------------------------------------------------------------------------|-------------------|
|                     | Table of contents Appendix Figures and Tables                                               | 1                 |
|                     |                                                                                             |                   |
| <b>App. Figures</b> |                                                                                             | <b>Page Start</b> |
| App. Figure S1      | Further characterization of airway organoids.                                               | 2                 |
| App. Figure S2      | Additional data of airway organoids to study cystic fibrosis.                               | 3                 |
| App. Figure S3      | Additional data of airway organoids to study cystic fibrosis.                               | 4                 |
| App. Figure S4      | Additional data of tumor airway organoids.                                                  | 5                 |
| App. Figure S5      | Single cell velocities of RSV-infected AOs and mathematical modelling of organoid rotation. | 6                 |
| App. Figure S6      | Inducible expression of NS2 in AOs.                                                         | 7                 |
|                     |                                                                                             |                   |
| <b>App. Tables</b>  |                                                                                             | <b>Page Start</b> |
| App. Table S1       | Cancer gene mutations in tumor tissue-AO pairs as identified by WGS                         | 8                 |
| App. Table S2       | Hotspot cancer gene sequencing results                                                      | 9                 |
| App. Table S3       | Sequence of used qPCR primers                                                               | 10                |
|                     |                                                                                             |                   |
| <b>App. Legends</b> | Legends for figures and tables                                                              | <b>11</b>         |

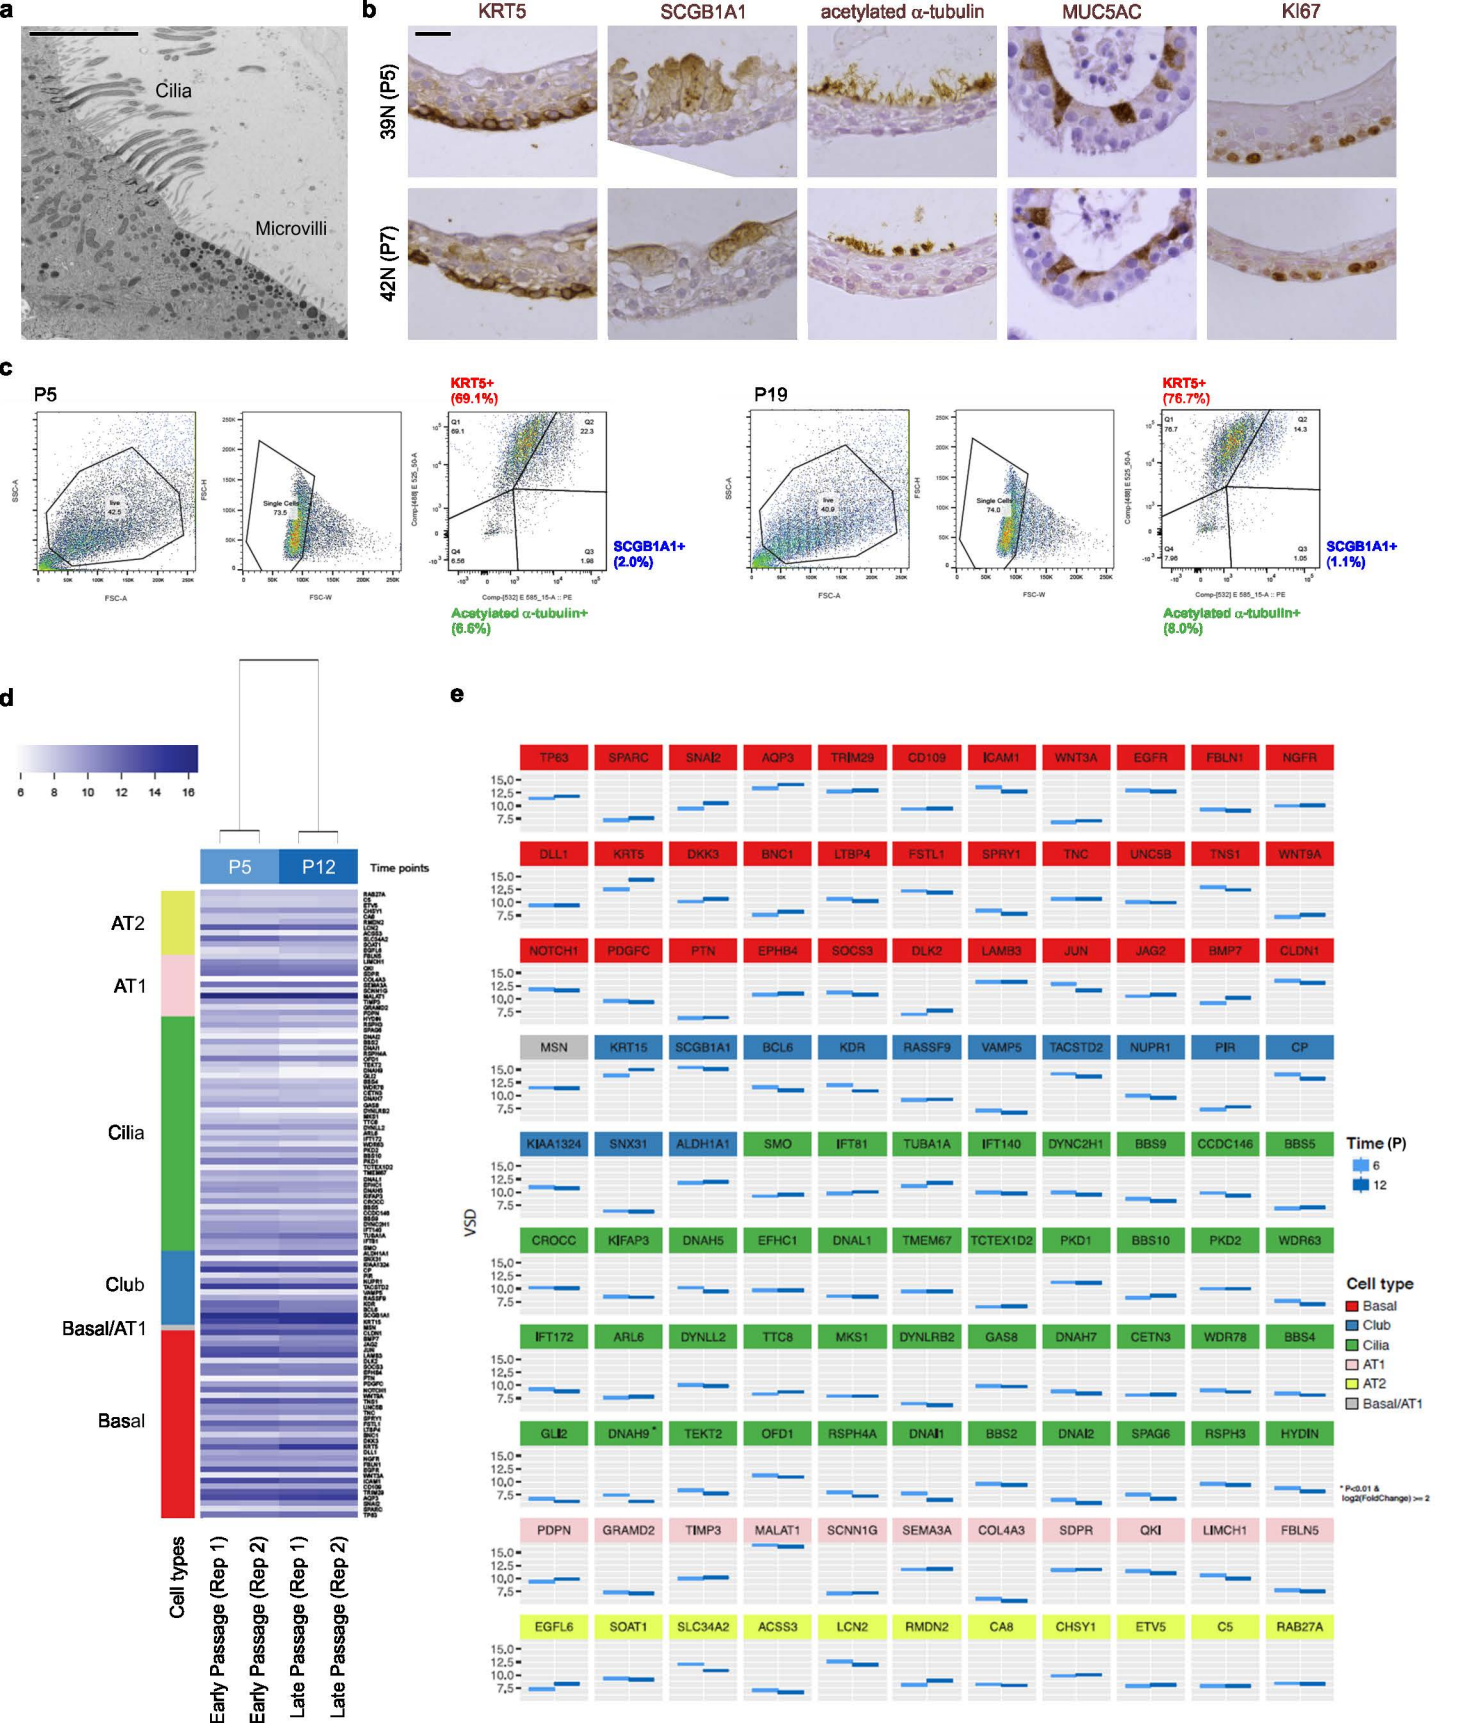

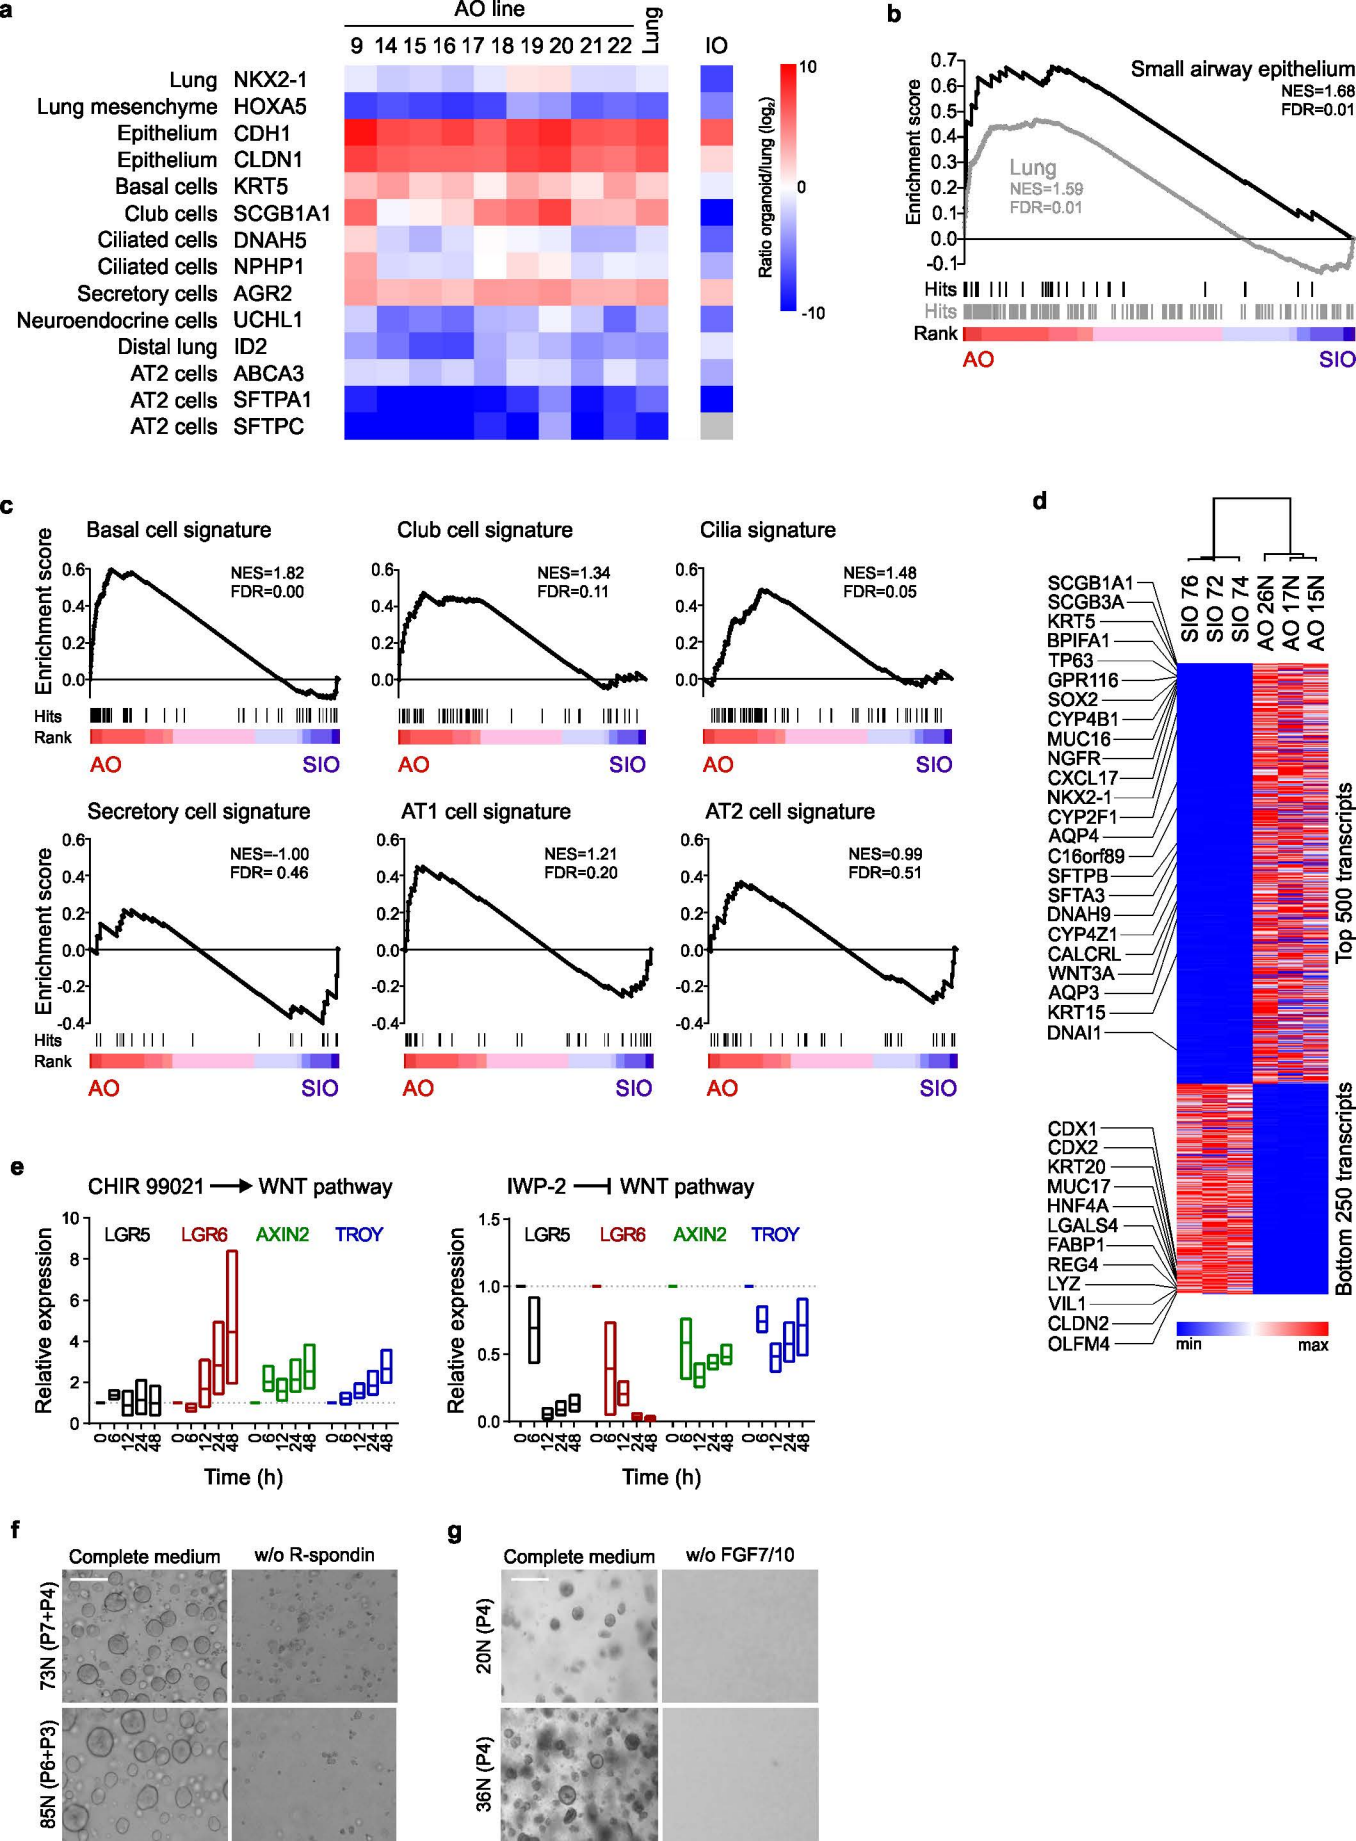

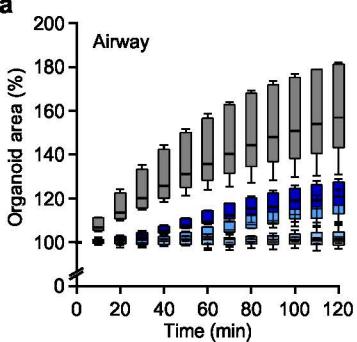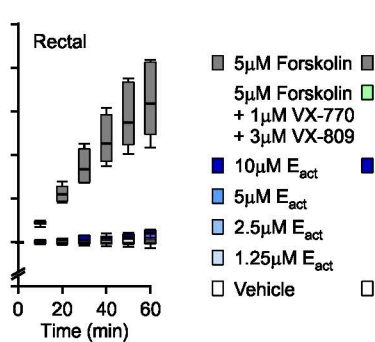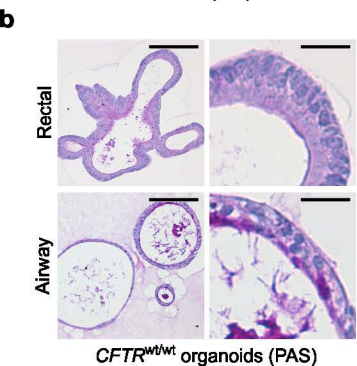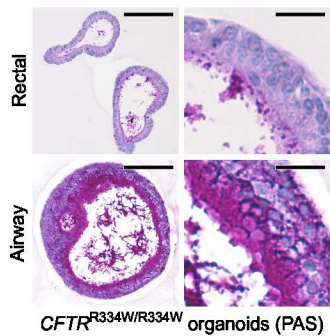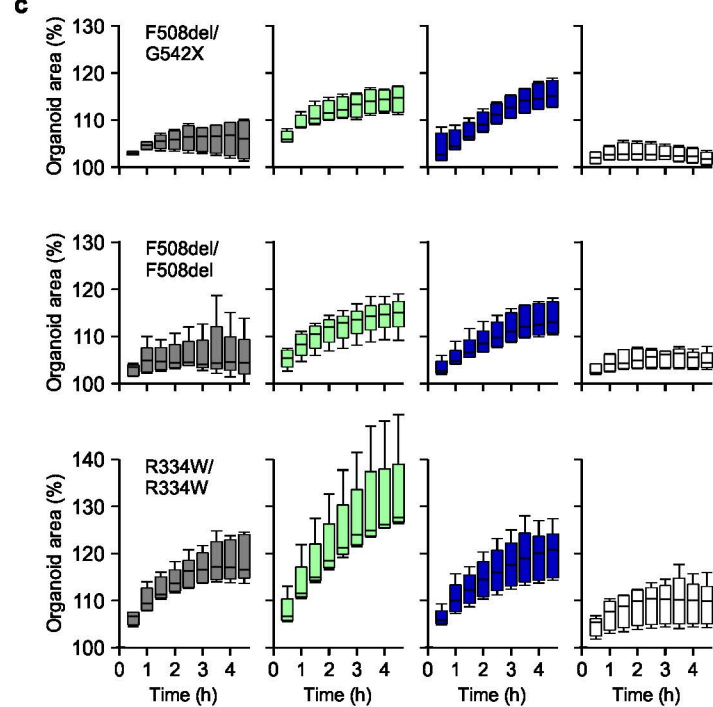

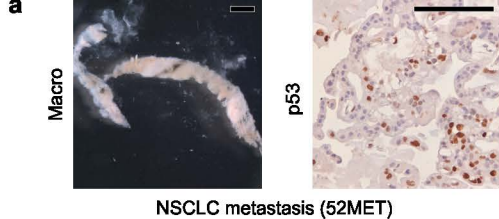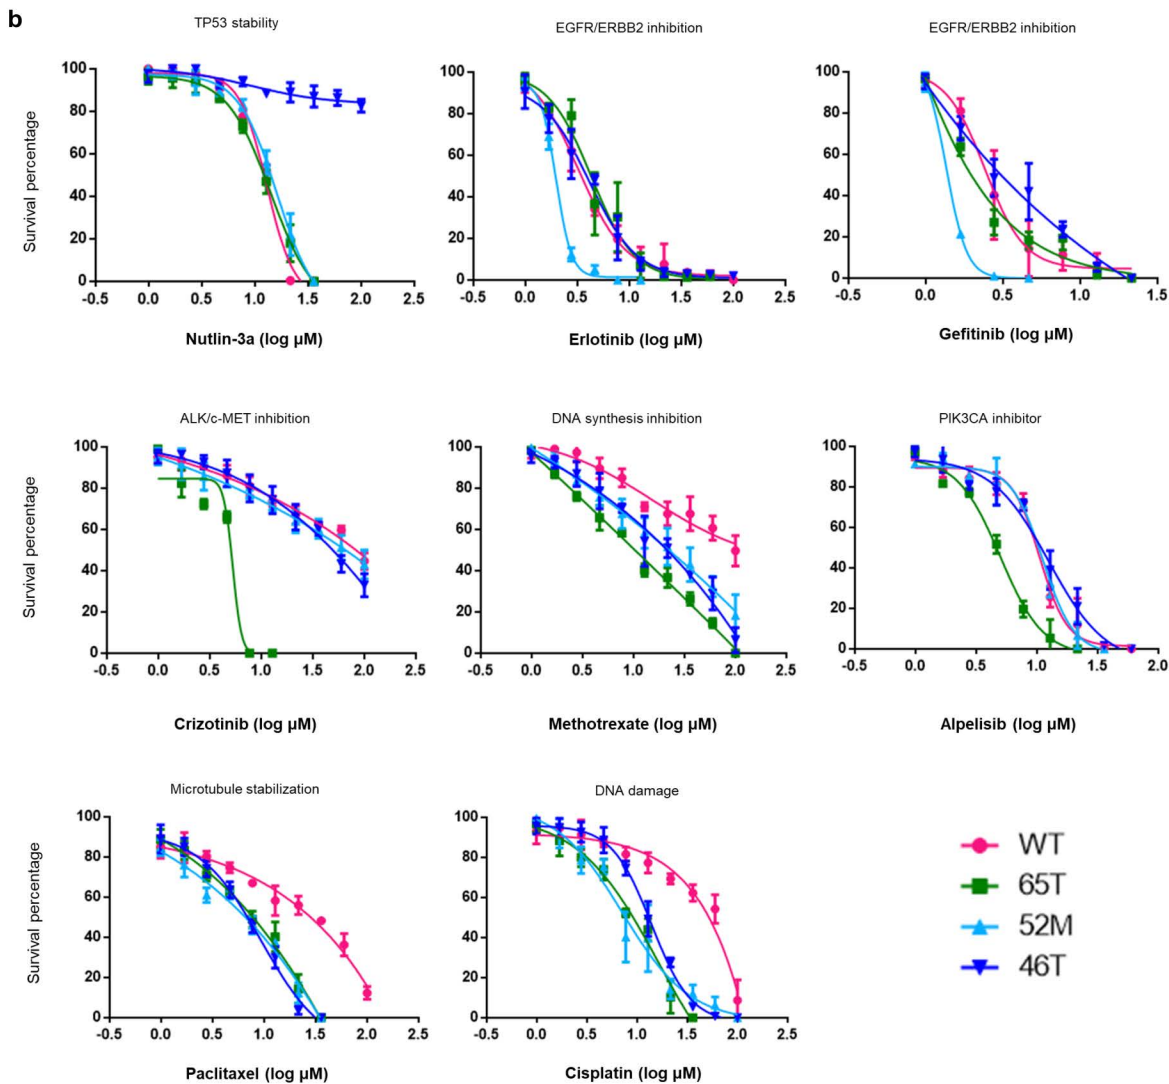

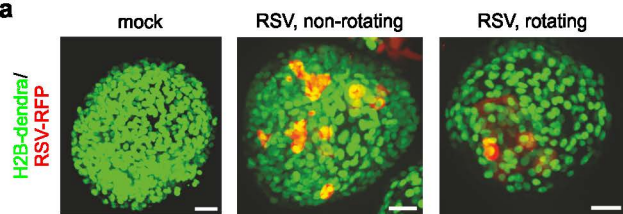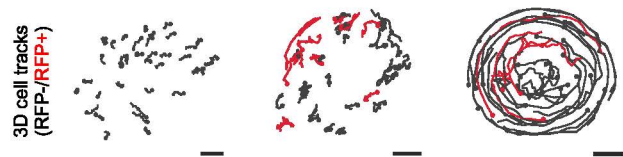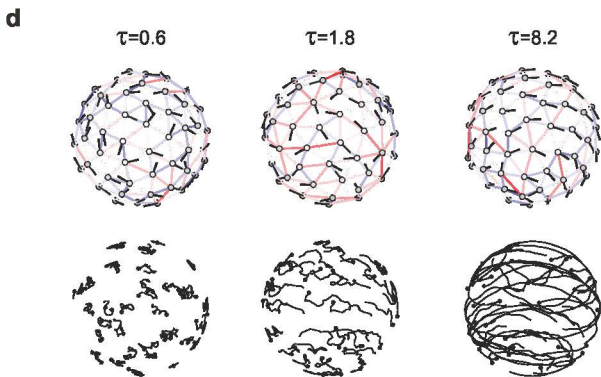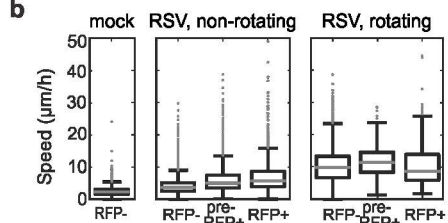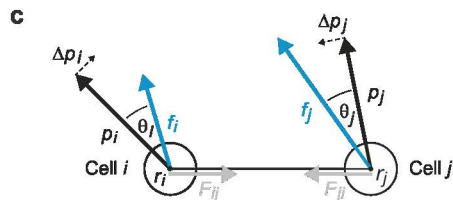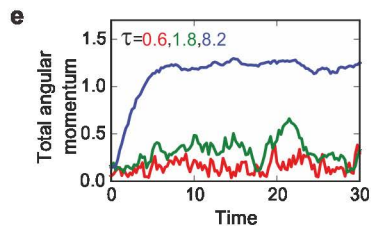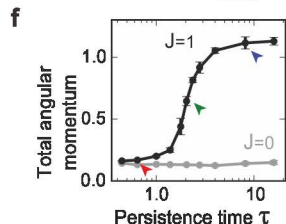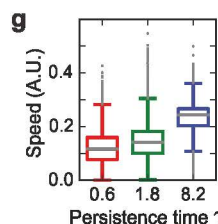

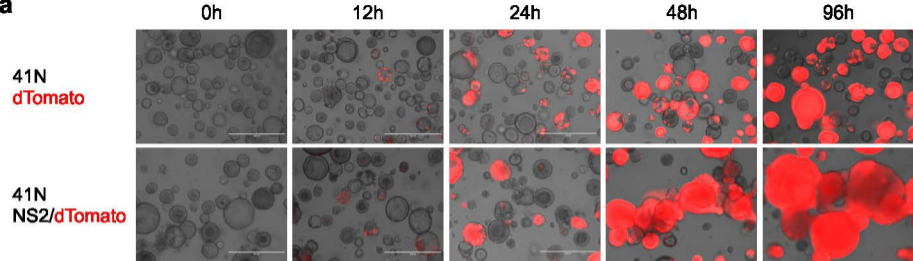

**b**

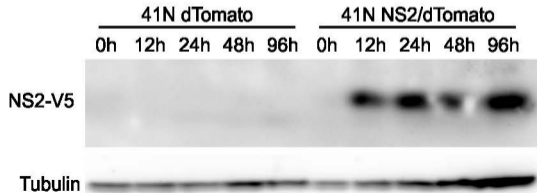

**Appendix Table S1: Cancer gene mutations as identified by WGS**

| SAMPLE_correc | CHROM | LOCATION  | COSMIC_ID   | REF | ALT | FILTER | VARIANT_TYPE     | SNPEFF_ANN | GENE     | TRANSCRIPT      | PROTEIN_CODING  |
|---------------|-------|-----------|-------------|-----|-----|--------|------------------|------------|----------|-----------------|-----------------|
| 57T-organoid  | 7     | 81689805  | COSM1199352 | C   | T   | PASS   | missense_variant | MODERATE   | CACNA2D1 | ENSG00000153956 | ENST00000356253 |
| 57T-tumor     | 7     | 81689805  | COSM1199352 | C   | T   | PASS   | missense_variant | MODERATE   | CACNA2D1 | ENSG00000153956 | ENST00000356253 |
| 57T-organoid  | 7     | 97860573  | COSM3394967 | C   | T   | PASS   | missense_variant | MODERATE   | TECPR1   | ENSG00000205356 | ENST00000379795 |
| 57T-tumor     | 7     | 97860573  | COSM3394967 | C   | T   | PASS   | missense_variant | MODERATE   | TECPR1   | ENSG00000205356 | ENST00000379795 |
| 57T-organoid  | 19    | 6904145   | COSM3541132 | C   | T   | PASS   | missense_variant | MODERATE   | EMR1     | ENSG00000174837 | ENST00000312053 |
| 57T-tumor     | 19    | 6904145   | COSM3541132 | C   | T   | PASS   | missense_variant | MODERATE   | EMR1     | ENSG00000174837 | ENST00000312053 |
| 65T-organoid  | 14    | 75373806  | COSM3690200 | G   | A   | PASS   | missense_variant | MODERATE   | RPS6KL1  | ENSG00000198208 | ENST00000358328 |
| 57T-tumor     | 14    | 75373806  | COSM3690200 | G   | A   | PASS   | missense_variant | MODERATE   | RPS6KL1  | ENSG00000198208 | ENST00000358328 |
| 57T-organoid  | 6     | 90428228  | COSM3876101 | C   | T   | PASS   | stop_gained      | HIGH       | MDN1     | ENSG00000112159 | ENST00000369393 |
| 57T-tumor     | 6     | 90428228  | COSM3876101 | C   | T   | PASS   | stop_gained      | HIGH       | MDN1     | ENSG00000112159 | ENST00000369393 |
| 65T-organoid  | 10    | 46121887  | COSM4014278 | G   | A   | PASS   | missense_variant | MODERATE   | ZFAND4   | ENSG00000172671 | ENST00000344646 |
| 65T-tumor     | 10    | 46121887  | COSM4014278 | G   | A   | PASS   | missense_variant | MODERATE   | ZFAND4   | ENSG00000172671 | ENST00000344646 |
| 65T-organoid  | 2     | 29940449  | COSM4312739 | C   | T   | PASS   | missense_variant | MODERATE   | ALK      | ENSG00000171094 | ENST00000389048 |
| 65T-tumor     | 2     | 29940449  | COSM4312739 | C   | T   | PASS   | missense_variant | MODERATE   | ALK      | ENSG00000171094 | ENST00000389048 |
| 65T-organoid  | 17    | 2995561   | COSM4506832 | G   | A   | PASS   | missense_variant | MODERATE   | OR1D2    | ENSG00000184166 | ENST00000331459 |
| 65T-tumor     | 17    | 2995561   | COSM4506832 | G   | A   | PASS   | missense_variant | MODERATE   | OR1D2    | ENSG00000184166 | ENST00000331459 |
| 57T-organoid  | 9     | 74309501  | COSM4588918 | T   | C   | PASS   | missense_variant | MODERATE   | TMEM2    | ENSG00000135048 | ENST00000377044 |
| 57T-tumor     | 9     | 74309501  | COSM4588918 | T   | C   | PASS   | missense_variant | MODERATE   | TMEM2    | ENSG00000135048 | ENST00000377044 |
| 57T-organoid  | 20    | 10036179  | COSM4661930 | G   | T   | PASS   | missense_variant | MODERATE   | ANKEF1   | ENSG00000132623 | ENST00000378380 |
| 65T-organoid  | 9     | 133942352 | COSM4697377 | C   | T   | PASS   | missense_variant | MODERATE   | LAMC3    | ENSG00000050555 | ENST00000361069 |
| 65T-tumor     | 9     | 133942352 | COSM4697377 | C   | T   | PASS   | missense_variant | MODERATE   | LAMC3    | ENSG00000050555 | ENST00000361069 |
| 65T-tumor     | 19    | 15794307  | COSM4988566 | C   | T   | PASS   | missense_variant | MODERATE   | CYP4F12  | ENSG00000186204 | ENST00000324632 |
| 57T-organoid  | 3     | 49699942  | COSM5087506 | G   | A   | PASS   | missense_variant | MODERATE   | BSN      | ENSG00000164061 | ENST00000296452 |
| 57T-tumor     | 3     | 49699942  | COSM5087506 | G   | A   | PASS   | missense_variant | MODERATE   | BSN      | ENSG00000164061 | ENST00000296452 |
| 65T-organoid  | 6     | 49808659  | COSM5173147 | C   | T   | PASS   | missense_variant | MODERATE   | CRISP1   | ENSG00000124812 | ENST00000335847 |
| 65T-tumor     | 6     | 49808659  | COSM5173147 | C   | T   | PASS   | missense_variant | MODERATE   | CRISP1   | ENSG00000124812 | ENST00000335847 |
| 65T-organoid  | 16    | 15141904  | COSM5213311 | C   | T   | PASS   | missense_variant | MODERATE   | NTAN1    | ENSG00000157045 | ENST00000287706 |
| 65T-tumor     | 16    | 15141904  | COSM5213311 | C   | T   | PASS   | missense_variant | MODERATE   | NTAN1    | ENSG00000157045 | ENST00000287706 |
| 57T-organoid  | 17    | 10225010  | COSM5385616 | C   | T   | PASS   | missense_variant | MODERATE   | MYH13    | ENSG00000006788 | ENST00000252172 |
| 57T-tumor     | 17    | 10225010  | COSM5385616 | C   | T   | PASS   | missense_variant | MODERATE   | MYH13    | ENSG00000006788 | ENST00000252172 |
| 57T-organoid  | 10    | 94836819  | COSM921543  | C   | T   | PASS   | stop_gained      | HIGH       | CYP26A1  | ENSG00000095596 | ENST00000224356 |
| 57T-organoid  | 17    | 15531954  | COSM975785  | G   | A   | PASS   | missense_variant | MODERATE   | TRIM16   | ENSG00000221926 | ENST00000336708 |
| 57T-tumor     | 17    | 15531954  | COSM975785  | G   | A   | PASS   | missense_variant | MODERATE   | TRIM16   | ENSG00000221926 | ENST00000336708 |



**Appendix Table S2: Hotspot cancer gene sequencing results**

|         | 46T                   | 47T                    | 51T                     | 52MET                              | 52METII                            | 53MET                         | 60MET                   |
|---------|-----------------------|------------------------|-------------------------|------------------------------------|------------------------------------|-------------------------------|-------------------------|
| ABL1    |                       |                        |                         |                                    |                                    |                               |                         |
| AKT1    |                       |                        |                         |                                    |                                    |                               |                         |
| ALK     |                       |                        |                         |                                    |                                    |                               |                         |
| APC     |                       |                        |                         |                                    |                                    |                               |                         |
| ATM     |                       |                        |                         |                                    |                                    |                               |                         |
| BRAF    |                       |                        |                         |                                    |                                    |                               |                         |
| BRCA1   |                       |                        |                         |                                    |                                    |                               |                         |
| BRCA2   |                       |                        |                         |                                    |                                    |                               |                         |
| CDH1    |                       |                        |                         |                                    |                                    |                               |                         |
| CDKN2A  |                       |                        |                         |                                    |                                    |                               |                         |
| CSF1R   |                       |                        |                         |                                    |                                    |                               |                         |
| CTNNB1  |                       |                        |                         |                                    |                                    |                               |                         |
| EGFR    |                       |                        | p.(Leu858Arg)<br>81.87% |                                    |                                    |                               |                         |
| ERBB2   |                       |                        |                         | p.(Gly776Ser)<br>66.77%            | p.(Gly776Ser)<br>70.41%            |                               |                         |
| ERBB2   |                       |                        |                         | p.(Gly778_Ser779<br>insSer) 66.67% | p.(Gly778_Ser779<br>insSer) 68.78% |                               |                         |
| ERBB4   |                       |                        |                         |                                    |                                    |                               |                         |
| EZH2    |                       |                        |                         |                                    |                                    |                               |                         |
| FBXW7   |                       |                        |                         |                                    |                                    |                               |                         |
| FGFR1   |                       |                        |                         |                                    |                                    |                               |                         |
| FGFR2   |                       |                        |                         |                                    |                                    |                               |                         |
| FGFR3   |                       |                        |                         |                                    |                                    |                               |                         |
| FLT3    |                       |                        |                         |                                    |                                    |                               |                         |
| GNA11   |                       |                        |                         |                                    |                                    |                               |                         |
| GNAQ    |                       |                        |                         |                                    |                                    |                               |                         |
| GNAS    |                       |                        |                         |                                    |                                    |                               |                         |
| HNF1A   |                       |                        |                         |                                    |                                    |                               |                         |
| HRAS    |                       |                        |                         |                                    |                                    |                               |                         |
| IDH1    |                       |                        |                         |                                    |                                    |                               |                         |
| IDH2    |                       |                        |                         |                                    |                                    |                               |                         |
| JAK2    |                       |                        |                         |                                    |                                    |                               |                         |
| JAK3    |                       |                        |                         |                                    |                                    |                               |                         |
| KDR     |                       |                        |                         |                                    |                                    |                               |                         |
| KIT     |                       |                        |                         |                                    |                                    |                               |                         |
| KRAS    |                       | p.(Gly12Val)<br>49.96% |                         |                                    |                                    |                               |                         |
| MET     |                       |                        |                         |                                    |                                    |                               |                         |
| MLH1    |                       |                        |                         |                                    |                                    |                               |                         |
| MPL     |                       |                        |                         |                                    |                                    |                               |                         |
| NOTCH1  |                       |                        |                         |                                    |                                    |                               |                         |
| NPM1    |                       |                        |                         |                                    |                                    |                               |                         |
| NRAS    |                       |                        |                         |                                    |                                    |                               |                         |
| PDGFRA  |                       |                        |                         |                                    |                                    |                               |                         |
| PIK3CA  |                       |                        |                         |                                    |                                    |                               |                         |
| PTEN    |                       |                        |                         |                                    |                                    |                               |                         |
| PTPN11  |                       |                        |                         |                                    |                                    |                               |                         |
| RB1     |                       |                        |                         |                                    |                                    |                               |                         |
| RET     |                       |                        |                         |                                    |                                    |                               |                         |
| SMAD4   |                       |                        |                         |                                    |                                    |                               |                         |
| SMARCB1 |                       |                        |                         |                                    |                                    |                               |                         |
| SMO     |                       |                        |                         |                                    |                                    |                               |                         |
| SRC     |                       |                        |                         |                                    |                                    |                               |                         |
| STK11   | p.(Glu165X)<br>100%   | p.(Glu165X)<br>100%    |                         |                                    |                                    |                               |                         |
| TP53    | p.(Arg248Trp)<br>100% | p.(Asp281Glu)<br>100%  |                         |                                    |                                    | p.(Phe212SerfsTer3)<br>51.07% | p.(Arg273His)<br>7.91%  |
| TP53    |                       |                        |                         |                                    |                                    |                               | p.(Tyr220Cys)<br>15.77% |
| VHL     |                       |                        |                         |                                    |                                    |                               |                         |

**Appendix Table S3: Sequence of used qPCR primers.**

| <b>q-PCR primers</b> | <b>FW</b>                       | <b>REV</b>                   |
|----------------------|---------------------------------|------------------------------|
| <b>HRPT</b>          | 5'-AAGAGCTATTGTAATGACCAGT-3'    | 5'-CAAAGTCTGCATTGTTTTGC-3'   |
| <b>NKX2-1</b>        | 5'-ACCAAGCGCATCCAATCTCA-3'      | 5'-CAGAGCCATGTCAGCACAGA-3'   |
| <b>HOXA5</b>         | 5'-CGAGCCACAAATCAAGCACA-3'      | 5'-GAATTGCTCGCTCACGGAAC-3'   |
| <b>CDH1</b>          | 5'-TTACTGCCCCAGAGGATGA-3'       | 5'-TGCAACGTCGTTACGAGTCA-3'   |
| <b>CLDN1</b>         | 5'-CTGTCATTGGGGGTGCGATA-3'      | 5'-CTGGCATTGACTGGGGTCAT-3'   |
| <b>KRT5</b>          | 5'-GCATCACCGTTCCTGGGTAA-3'      | 5'-GACACACTTGACTGGCGAGA-3'   |
| <b>SCGB1A1</b>       | 5'-TCCTCCACCATGAAACTCGC-3'      | 5'-AGGAGGGTTTTGATGACACG-3'   |
| <b>DNAH5</b>         | 5'-AGAGGCCATTCGCAAACGTA-3'      | 5'-CCCGGAAAATGGGCAAACG-3'    |
| <b>NPHP1</b>         | 5'-CAGAGCCACATGGCAACCTA-3'      | 5'-ACCCAGCCACAGCTTAACTC-3'   |
| <b>AGR2</b>          | 5'-TCAGAAGCTTGGACCGCATC-3'      | 5'-AGTGTAGGAGAGGGCCACAA-3'   |
| <b>UCHL1</b>         | 5'-GACGAATGCCTTTCCGGTG-3'       | 5'-AGAAGCGGACTTCTCCTTGC-3'   |
| <b>ID2</b>           | 5'-GCAGCACGTCATCGACTACA-3'      | 5'-TTCAGAAGCCTGCAAGGACA-3'   |
| <b>ABCA3</b>         | 5'-CACCAGGGGCTCTCTAGACT-3'      | 5'-ACAGCCATCGTCTTGCTGAA-3'   |
| <b>SFTPA1</b>        | 5'-CAGACGGGACCCCTGTAAAC-3'      | 5'-CCTGTCATTCCACTGCCCAT-3'   |
| <b>SFTPC</b>         | 5'-ATGGATGTGGGCAGCAAAGA-3'      | 5'-CAGCAGGGAATGCCAAATCG-3'   |
| <b>LGR5</b>          | 5'-CACCGCTCTCAGTCACTGGATAAGC-3' | 5'-AAACGCTTATCCAGTGAAGAGC-3' |
| <b>LGR6</b>          | 5'-CCAAGGACAGTTTCCCAAAA-3'      | 5'-GACTCCTCATCATCAAGGTGAA-3' |
| <b>AXIN2</b>         | 5'-AGCTTACATGAGTAATGGGG-3'      | 5'-AATTCATCTACACTGCTGTC-3'   |
| <b>TROY</b>          | 5'-TGATGAAAGTAGGCAGGGCTGTGT-3'  | 5'-TCTCCAGCCAGTGTTCCTTGA-3'  |

**Appendix Figure S 1. Further characterization of airway organoids.**

**a**, Transmission electron micrograph showing a multi-ciliated cell next to a cell with microvilli and apical vesicles. Scale bar equals 2 $\mu$ m. See also Movie EV 1.

**b**, Immunohistochemical analysis of AO lines 39 and 42. Shown are markers of basal cells (KRT5), club cells (SCGB1A1), multi-ciliated cells (acetylated  $\alpha$ -tubulin), secretory cells (MUC5AC), and proliferation (KI67). Scale bar equals 5 $\mu$ m. Micrographs have been rotated and cropped to align epithelia resulting in the cropped edge of 39N SCGB1QA1.

**c**, Quantification of cell types in AO lines at early and late passage (P5 vs P19) as determined by flow cytometry using the indicated markers. The number of basal cells, club cells, ciliated cells, and secretory cells does not differ significantly between early and late passage AOs.

**d, e**, RNA sequencing of early (5) vs late (12) AOs indicates similar expression of cell type specific marker genes. Shown is a heat map comparing the expression levels of lineage markers (**d**) as well as detailed expression levels of selected markers (**e**). Variance Stabilizing Transformed (VSD) values are plotted to facilitate comparison across different markers. See Table 2.

**Appendix Figure S 2. Further characterization of airway organoids.**

**a**, Heat map showing qPCR results of marker gene expression in ten individual AO lines compared to whole lung and one intestinal organoid line. Data are shown as log<sub>2</sub>-transformed ratio of sample over whole lung. AOs express lung cell marker *NKX2-1* at comparable levels to whole lung (pale blue to pale red), while being negative for lung mesenchymal marker gene *HOXA5* (dark blue) and strongly positive for general epithelial markers *CDH1* and *CLDN1* (dark red). AOs furthermore express relatively more *KRT5* (basal cell marker), *SCGB1A1* (club cell marker), and *AGR2* (secretory cell marker). Ciliated cell markers *DNAH5* and *NPHP1* are expressed at similar levels in AOs and whole lung (pale blue to pale red). AOs express less of neuroendocrine marker *UCHL1*, distal lung marker *ID2*, and AT2 markers *ABCA3*, *SFTPA1*, and *SFTPC* (white to dark blue). The intestinal organoid line is positive for

epithelial, basal, and secretory cell markers (pale red to red), and negative for general lung, lung mesenchyme, club cell, ciliated cell, neuroendocrine cell, distal lung, and AT2 cell markers (pale blue to dark blue).

**b**, GSEA plots showing strong enrichment of small airway epithelium and lung gene signatures in transcriptomes of three AO lines compared to three small intestinal organoid (SIO) lines. NES = normalized enrichment score, FDR = false discovery rate. See Table 3.

**c**, Top row: GSEA plots showing enrichment of gene signatures of basal cells, cilia, and club cells in transcriptomes of three AO lines compared to three small intestinal organoid (SIO) lines. Bottom row: GSEA plots showing no enrichment of gene signatures of secretory cells, AT1 cells, and AT2 cells in the same data set. NES = normalized enrichment score, FDR = false discovery rate. See Table 3 for signatures and leading-edge genes.

**d**, Hierarchical clustering of the indicated AO and SIO lines. Analysis is based on the top 500 and bottom 250 expressed genes in averaged AO vs SIO transcripts (full list in Table 3). Gradients depict the relative maximum and minimum values per transcript. Names and ranks of signature lung and intestinal genes are indicated.

**e**, Box and Whiskers plots showing changes in the expression of WNT target genes over time following manipulation of the WNT pathway. Upon strong activation of the WNT pathway using GSK-3 inhibitor CHIR 99021, *LGR5* expression remains unaltered, while expression of *AXIN2* and *TROY* is moderately and expression of *LGR6* is strongly increased. Upon blocking the WNT pathway with porcupine inhibitor IWP-2, *LGR5* and *LGR6* expression drops sharply, while *AXIN2* and *TROY* expression is decreased moderately. Analysis is based on three independent experiments using AO lines 15, 17, and 26. Whiskers indicate smallest and largest values, boxes indicate 25<sup>th</sup> to 75<sup>th</sup> percentile, horizontal solid line indicates median.

**f**, Phase contrast images of two independent AO lines grown in the presence and absence of R-spondin. After 3-4 passages without R-spondin, AOs cannot be expanded further (right column). Scale bar equals 100  $\mu\text{m}$ .

g, Phase contrast images of two independent AO lines grown in the presence and absence of FGF-7 and FGF-10. After 4 passages without FGFs, no AOs remain in culture (right column). Scale bars equals 100 $\mu$ m.

**Appendix Figure S 3. Additional data of airway organoids to study cystic fibrosis.**

a, Box-and-Whisker plots showing organoid swelling over time following stimulation with forskolin or  $E_{act}$ . While forskolin causes swelling in both organoid types (grey boxes),  $E_{act}$  causes concentration-dependent swelling only of AOs (blue hued boxes). Shown are pooled data from three different AO and two different rectal organoid lines used in three to four independent experiments. See Figure 2a, b for the respective AUC plots. Whiskers indicate smallest and largest values, boxes indicate 25<sup>th</sup> to 75<sup>th</sup> percentile, horizontal solid line indicates median.

b, Representative histological sections of PAS-stained wild-type organoids (unmatched, left panel) and organoids from a CF patient with  $CFTR^{R334W/R334W}$  mutation (right panel). PAS-positive mucus is occasionally present within wild-type AOs but not rectal wild-type organoids, while the CF patient AOs regularly show thick layers of PAS-positive mucus. Rectal organoids from the same CF patient display only occasional regions with PAS-positive mucus. Rectal organoids were generated from rectal biopsies, AOs were generated from lung resection (wild-type) or BAL-fluid (CF patient). Scale bars equal 50  $\mu$ m (overviews) and 10  $\mu$ m (details). See Figure 2c for PAS-stained  $CFTR^{F508del/F508del}$  organoid sections.

c, Box-and-Whisker plots showing CF patient AO swelling over time following addition of the indicated stimuli. The respective CFTR mutations are given atop every row of plots. Forskolin-induced swelling (grey boxes) does not exceed vehicle controls in AOs with  $CFTR^{F508del/G542X}$  and  $CFTR^{F508del/F508del}$  genotypes, but increases in the presence of VX-770 and VX-809 (green boxes). In the same organoids,  $E_{act}$ -induced swelling (blue boxes) exceeds forskolin-induced swelling to a similar extent. AOs with the milder  $CFTR^{R334W/R334W}$  genotype (bottom row) show moderate forskolin-induced swelling that is increased in the presence of VX-770 and VX-809 and paralleled by  $E_{act}$ -induced swelling. Shown are pooled data of four to five independent experiments. See Figure 2d for the corresponding AUC-plots. Whiskers

indicate smallest and largest values, boxes indicate 25<sup>th</sup> to 75<sup>th</sup> percentile, horizontal solid line indicates median.

**Appendix Figure S 4. Additional data of tumor airway organoids.**

**a,** Macroscopic photograph of a NSCLC metastasis biopsy and p53 immunohistochemistry of the derived tumor AO line 52MET. Scale bars equal 2 mm and 200  $\mu\text{m}$ .

**b,** Shown are dose response curves of several AO lines treated with erlotinib, gefitinib (both targeting EGFR/ERBB2 mutations), crizotinib (targeting ALK mutations), methotrexate (targeting DNA synthesis), paclitaxel (targeting microtubule disassembly), Nutlin-3a (stabilizing p53), alpelisib (targeting PIK3CA mutations), and cisplatin (inducing DNA damage). See Figure 3d for a summarizing heat map of the corresponding  $\log\text{IC}_{50}$  values. Data shown are representatives of at least 3 independent experiments. Error bars indicate s.e.m.

Appendix Figure S 5. Single cell velocities of RSV-infected AOs and mathematical modelling of organoid rotation.

**a,** Examples of non-infected (left), RSV-infected and non-rotating (middle), and RSV-infected and rotating (right) organoids with the corresponding tracks of randomly selected nuclei ( $n=41, 33, 35$  respectively). Track durations are 14 h. Circles indicate the starting position of each track, and line color stands for either RFP- (black) or RFP+ (red) cells. Scale bars represent 25 $\mu\text{m}$ .

**b,** Tukey Box plots of the speed distribution of every tracked nucleus at each time point for non-infected ( $n=3$ ), infected but non-rotating ( $n=6$ ) and infected and rotating ( $n=3$ ) organoids, where 15-45 individual nuclei were tracked per organoid. For the infected organoids, nuclei were classified as RFP- when they showed no RFP signal for the duration of the track, pre-RFP+ when the nuclei showed no RFP signal yet but became RFP+ later, and RFP+ for nuclei that showed RFP signal. Horizontal solid line indicate median box, box indicates 25<sup>th</sup> to 75<sup>th</sup> percentile, whiskers indicate 25<sup>th</sup> percentile minus 1.5 times inter-quartile distance (IQR) or 75<sup>th</sup> percentile plus 1.5 times IQR, circles indicate individual values greater than 1.5 times IQR.

c, Vector schematic depicting the modelled relation between cells migrating within the constraints of an organoid sphere. See Methods and Protocols for details.

d, Snapshots of the cell configuration (left) and cell tracks (right) for simulations with  $n=100$  cells and increasing persistence time  $\tau=0.6, 1.8$  and  $8.2$ . The persistence time indicates the mean time over which the cell maintains its direction of polarization, in the absence of cell-cell interactions. White markers represent cell centres, with black lines showing the direction of the polarization vector. Adjacent cells are connected by springs, which are shown as coloured lines. Springs are red when stretched and blue when compressed. Cell tracks are shown for the same time period for all three simulations, with black circles indicating the starting position of each track. See also **Movie EV 7**.

e, Total angular momentum of the cell configuration as a function of time for simulations starting with random initial distribution of polarity vectors. For sufficiently high persistence time ( $\tau=8.2$ , blue line), the cells rapidly establish rotational motion.

f, Total steady state angular momentum as function of the persistence time  $\tau$ , for simulations with cell-cell communication (black,  $J=1$ ) and without (grey,  $J=0$ ). Coloured arrows indicate the persistence times corresponding to the simulations in panel e.

g, Box plots of the distribution of cell speed for the different persistence times in panel (E). The distribution is calculated from  $n=5$  independent simulations. Horizontal solid line indicates median, box indicates 25<sup>th</sup> to 75<sup>th</sup> percentile, whiskers indicate 25<sup>th</sup> percentile minus 1.5 times inter-quartile distance (IQR) or 75<sup>th</sup> percentile plus 1.5 times IQR, circles indicate individual values greater than 1.5 times IQR.

### **Appendix Figure S 6. Inducible expression of NS2 in AOs.**

a, Brightfield/fluorescent micrographs of AOs inducibly overexpressing dTomato (top) or NS2 and dTomato (bottom) taken at the indicated time points following stimulation with doxycycline. While red signal increases in both lines, organoid fusion exclusively takes place in AOs expressing NS2. See **Movie EV 11**. Scale bars equal  $400 \mu\text{m}$ .

**b**, Western blots of protein lysates from the indicated AOs taken at the indicated time points following stimulation with doxycycline. NS2 protein is robustly detectable after 12h of stimulation.

Appendix ***Tables***

Appendix **Table S 1** – Cancer gene mutations in tumor tissue-AO pairs as identified by WGS

Appendix **Table S 2** – Hotspot cancer gene sequencing of tumoroids

Appendix **Table S 3** – Sequence of used qPCR primers
